# Supplementary material for: Enhanced Intestinal Immune Response in Mice after Oral Administration of Korea Red Ginseng-Derived Polysaccharide
Source: PubMed Central journal article supplement (PMC7600159; doi:10.3390/polym12102186), 2020-09-24
Supplement: polymers-12-02186-s001.pdf [file polymers-12-02186-s001.pdf]

# Enhanced Intestinal Immune Response in Mice after Oral Administration of Korea Red Ginseng-Derived Polysaccharide

Do Hwi Park <sup>1</sup>, Byungcheol Han <sup>2</sup>, Myoung-Sook Shin <sup>1,\*</sup> and Gwi Seo Hwang <sup>1,\*</sup>

<sup>1</sup> College of Korean Medicine, Gachon University, Seongnam-si, Gyeonggi-do 13120, Korea; parkdo@gc.gachon.ac.kr

<sup>2</sup> Efficacy & Safety Team, Korea Ginseng Corp., 30, Gajeong-ro, Yuseong-gu, Daejeon 34128, Korea; bchan@kgc.co.kr

\* Correspondence: ms.shin@gachon.ac.kr (M.-S.S.); seoul@gachon.ac.kr (G.S.H.);

Tel.: +82-31-750-5423 (M.-S.S.); +82-31-750-5421 (G.S.H.)

Received: 18 August 2020; Accepted: 23 September 2020; Published: date

## Supplementary material

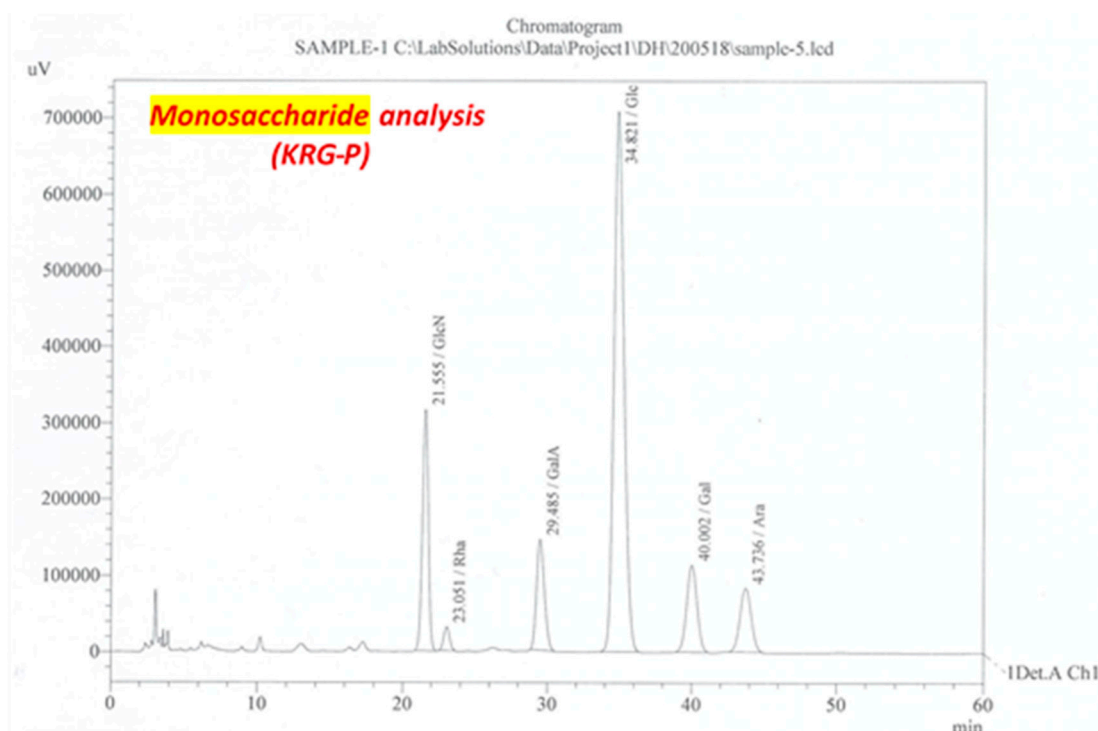

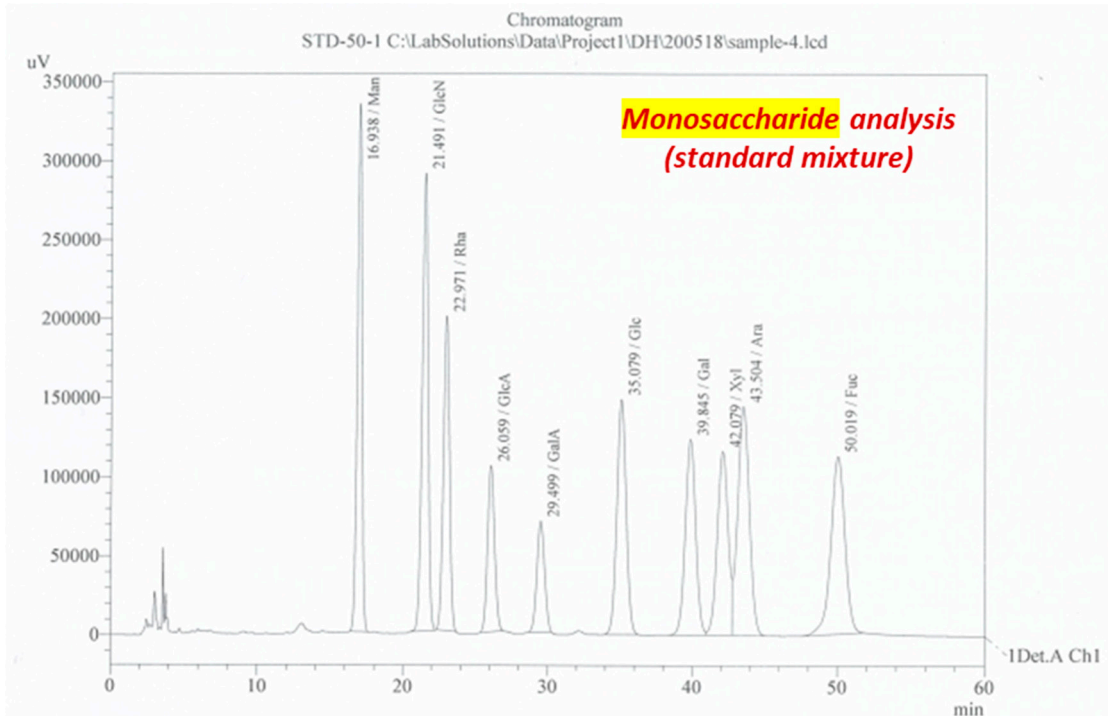

Figure S1. A HPLC chromatograms KRG-P monosaccharide analysis.
